# Supplementary material for: TP73-AS1 is induced by YY1 during TMZ treatment and highly expressed in the aging brain
Source: Aging (Albany NY). 2021 Jun 11;13(11):14843–61. doi: 10.18632/aging.203182 (PMC8221307; doi:10.18632/aging.203182)
Supplement: Supplementary Table 1 [file aging-13-203182-s002.xlsx]

## Sheet: Sheet1
Supplementary Table 1. oPPOSUM output.
TF	JASPAR ID	Class	Family	Tax group	IC	GC Content	Target gene hits	Target gene non-hits	Background gene hits	Background gene non-hits	Target TFBS hits	Target TFBS nucleotide rate	Background TFBS hits	Background TFBS nucleotide rate	Z-score	Fisher score
Foxd3	MA0041.1	Winged Helix-Turn-Helix	Forkhead	vertebrates	12.945	0.223	895	720	11354	13398	4476	0.0176	49535	0.0165	14.603	30.446
NKX3-1	MA0124.1	Helix-Turn-Helix	Homeo	vertebrates	11.127	0.179	995	620	12654	12098	6252	0.0143	68823	0.0134	14.28	36.559
ARID3A	MA0151.1	Helix-Turn-Helix	Arid	vertebrates	9.896	0.062	1213	402	16086	8666	14726	0.0289	166235	0.0277	12.856	38.975
Foxq1	MA0040.1	Winged Helix-Turn-Helix	Forkhead	vertebrates	14.07	0.202	671	944	8007	16745	2030	0.00731	22088	0.00675	11.911	30.817
IRF2	MA0051.1	Winged Helix-Turn-Helix	IRF	vertebrates	21.134	0.412	92	1523	844	23908	103	0.000607	923	0.000462	11.804	12.208
Nkx2-5	MA0063.1	Helix-Turn-Helix	Homeo	vertebrates	8.27	0.218	1269	346	16973	7779	17290	0.0396	197210	0.0384	11.457	40.727
IRF1	MA0050.1	Winged Helix-Turn-Helix	IRF	vertebrates	16.008	0.383	528	1087	6075	18677	1079	0.00424	11517	0.00384	11.247	28.109
SRY	MA0084.1	Other Alpha-Helix	High Mobility Group	vertebrates	9.193	0.238	1121	494	14714	10038	8982	0.0265	101929	0.0255	10.766	35.167
Lhx3	MA0135.1	Helix-Turn-Helix	Homeo	vertebrates	16.354	0.131	485	1130	5806	18946	1181	0.00503	12758	0.00461	10.759	19.733
Foxa2	MA0047.2	Winged Helix-Turn-Helix	Forkhead	vertebrates	13.268	0.315	923	692	11656	13096	3878	0.0152	43535	0.0145	10.471	33.55
HOXA5	MA0158.1	Helix-Turn-Helix	Homeo	vertebrates	8.759	0.315	1312	303	17629	7123	17928	0.0469	205993	0.0458	9.676	43.391
Pax4	MA0068.1	Helix-Turn-Helix	Homeo	vertebrates	11.004	0.441	14	1601	112	24640	15	0.000147	113	9.42e-05	9.535	3.804
FOXI1	MA0042.1	Winged Helix-Turn-Helix	Forkhead	vertebrates	13.183	0.263	921	694	11680	13072	4361	0.0171	49366	0.0165	9.197	32.195
Ar	MA0007.1	Zinc-coordinating	Hormone-nuclear Receptor	vertebrates	15.703	0.498	57	1558	534	24218	60	0.000432	554	0.000339	8.859	7.631
NFIL3	MA0025.1	Zipper-Type	Leucine Zipper	vertebrates	14.139	0.265	545	1070	6731	18021	1440	0.00519	15828	0.00484	8.741	18.207
FOXO3	MA0157.1	Winged Helix-Turn-Helix	Forkhead	vertebrates	11.734	0.298	1067	548	13611	11141	6109	0.016	69410	0.0154	8.057	41.411
Pou5f1	MA0142.1	Helix-Turn-Helix	Homeo	vertebrates	14.808	0.308	281	1334	3402	21350	485	0.00238	5205	0.00217	7.956	10.188
Pdx1	MA0132.1	Helix-Turn-Helix	Homeo	vertebrates	9.04	0.194	1150	465	15507	9245	12314	0.0242	140973	0.0235	7.867	27.364
NR1H2::RXRA	MA0115.1	Zinc-coordinating	Hormone-nuclear Receptor	vertebrates	27.878	0.445	14	1601	99	24653	14	7.79e-05	100	4.72e-05	7.758	4.689
Gfi	MA0038.1	Zinc-coordinating	BetaBetaAlpha-zinc finger	vertebrates	9.47	0.391	1098	517	13731	11021	5762	0.0189	65844	0.0183	7.371	52.564
ESR1	MA0112.2	Zinc-coordinating	Hormone-nuclear Receptor	vertebrates	13.563	0.594	36	1579	345	24407	39	0.000255	355	0.000197	7.203	5.005
PPARG	MA0066.1	Zinc-coordinating	Hormone-nuclear Receptor	vertebrates	20.365	0.523	9	1606	62	24690	9	5.89e-05	64	3.56e-05	6.797	3.545
Sox5	MA0087.1	Other Alpha-Helix	High Mobility Group	vertebrates	10.831	0.199	1001	614	13087	11665	6303	0.0144	72042	0.014	6.389	28.296
FOXF2	MA0030.1	Winged Helix-Turn-Helix	Forkhead	vertebrates	14.824	0.334	358	1257	4097	20655	588	0.00269	6459	0.00251	6.349	18.414
FOXA1	MA0148.1	Winged Helix-Turn-Helix	Forkhead	vertebrates	12.533	0.332	1034	581	13355	11397	5490	0.0198	63112	0.0193	6.067	34.318
Tal1::Gata1	MA0140.1	Zipper-Type	Helix-Loop-Helix	vertebrates	11.297	0.451	503	1112	6212	18540	993	0.00585	11200	0.0056	5.829	16.506
TBP	MA0108.2	Beta-sheet	TATA-binding	vertebrates	10.086	0.377	820	795	10389	14363	2947	0.0145	33775	0.0141	5.822	26.454
FOXD1	MA0031.1	Winged Helix-Turn-Helix	Forkhead	vertebrates	11.926	0.275	1013	602	13087	11665	5484	0.0144	62921	0.014	5.565	32.751
T	MA0009.1	Beta-Hairpin-Ribbon	T	vertebrates	17.863	0.452	166	1449	1811	22941	201	0.000724	2114	0.000646	5.326	10.982
SOX9	MA0077.1	Other Alpha-Helix	High Mobility Group	vertebrates	9.079	0.358	910	705	11417	13335	3619	0.0107	41403	0.0104	5.31	34.551
CEBPA	MA0102.2	Zipper-Type	Leucine Zipper	vertebrates	8.712	0.358	1001	614	12828	11924	4837	0.0143	55606	0.0139	5.133	34.509
PBX1	MA0070.1	Helix-Turn-Helix	Homeo	vertebrates	14.641	0.31	346	1269	4107	20645	597	0.00235	6634	0.00221	4.942	14.278
Prrx2	MA0075.1	Helix-Turn-Helix	Homeo	vertebrates	9.063	0.027	1131	484	15063	9689	10688	0.0175	123270	0.0171	4.937	30.528
HNF1B	MA0153.1	Helix-Turn-Helix	Homeo	vertebrates	16.821	0.222	341	1274	4107	20645	621	0.00244	6910	0.0023	4.925	12.799
MYC::MAX	MA0059.1	Zipper-Type	Helix-Loop-Helix	vertebrates	14.237	0.602	305	1310	3436	21316	414	0.00149	4535	0.00139	4.904	16.922
MEF2A	MA0052.1	Other Alpha-Helix	MADS	vertebrates	15.709	0.179	541	1074	7006	17746	1382	0.00452	15631	0.00434	4.793	12.059
NR2F1	MA0017.1	Zinc-coordinating	Hormone-nuclear Receptor	vertebrates	15.924	0.478	319	1296	3735	21017	457	0.00209	5073	0.00197	4.753	14.269
TLX1::NFIC	MA0119.1	Helix-Turn-Helix::Other	Homeo::Nuclear Factor I-CCAAT-binding	vertebrates	19.665	0.598	100	1515	1066	23686	111	0.000509	1162	0.000452	4.645	7.804
ELK4	MA0076.1	Winged Helix-Turn-Helix	Ets	vertebrates	14.123	0.583	520	1095	6034	18718	836	0.00246	9342	0.00234	4.579	26.213
NR4A2	MA0160.1	Zinc-coordinating	Hormone-nuclear Receptor	vertebrates	10.165	0.491	1087	528	13896	10856	5210	0.0136	60034	0.0133	4.541	42.4
HLF	MA0043.1	Zipper-Type	Leucine Zipper	vertebrates	11.147	0.394	460	1155	5508	19244	884	0.00347	9969	0.00332	4.5	18.504
Nkx3-2	MA0122.1	Helix-Turn-Helix	Homeo	vertebrates	8.542	0.463	1195	420	15425	9327	7907	0.0233	91612	0.0229	4.485	49.481
AP1	MA0099.2	Zipper-Type	Leucine Zipper	vertebrates	9.193	0.405	1245	370	16390	8362	9767	0.0224	113253	0.022	4.182	45.816
MIZF	MA0131.1	Zinc-coordinating	BetaBetaAlpha-zinc finger	vertebrates	13.197	0.61	193	1422	2080	22672	231	0.000756	2497	0.000694	4.126	13.351
MAX	MA0058.1	Zipper-Type	Helix-Loop-Helix	vertebrates	12.685	0.571	685	930	7993	16759	1395	0.00457	15900	0.00442	3.904	36.709
ZEB1	MA0103.1	Zinc-coordinating	BetaBetaAlpha-zinc finger	vertebrates	8.305	0.557	1357	258	17454	7298	14708	0.0289	171132	0.0285	3.734	78.362
SRF	MA0083.1	Other Alpha-Helix	MADS	vertebrates	17.965	0.466	85	1530	908	23844	96	0.000377	1019	0.00034	3.524	6.776
HNF1A	MA0046.1	Helix-Turn-Helix	Homeo	vertebrates	15.548	0.259	270	1345	3044	21708	386	0.00177	4352	0.00169	3.222	14.878
RORA_2	MA0072.1	Zinc-coordinating	Hormone-nuclear Receptor	vertebrates	17.425	0.369	293	1322	3571	21181	449	0.00206	5079	0.00198	3.215	10.148
znf143	MA0088.1	Zinc-coordinating	BetaBetaAlpha-zinc finger	vertebrates	17.541	0.53	121	1494	1301	23451	133	0.000871	1473	0.000819	3.176	8.849
Nr2e3	MA0164.1	Zinc-coordinating	Hormone-nuclear Receptor	vertebrates	12.028	0.373	515	1100	6354	18398	1081	0.00248	12287	0.00239	3.111	17.109
Gata1	MA0035.2	Zinc-coordinating	GATA	vertebrates	10.878	0.373	1107	508	14350	10402	6517	0.0235	75905	0.0232	3.078	38.78
Pax6	MA0069.1	Helix-Turn-Helix	Homeo	vertebrates	13.798	0.432	104	1511	1218	23534	125	0.000573	1377	0.000536	2.795	5.276
Sox2	MA0143.1	Other Alpha-Helix	High Mobility Group	vertebrates	12.951	0.361	245	1370	2809	21943	337	0.00165	3844	0.0016	2.288	12.354
Nobox	MA0125.1	Helix-Turn-Helix	Homeo	vertebrates	9.573	0.26	1035	580	13558	11194	6616	0.0173	77190	0.0172	2.239	29.775
NFYA	MA0060.1	Other Alpha-Helix	NFY CCAAT-binding	vertebrates	12.925	0.523	491	1124	5865	18887	820	0.00429	9476	0.00421	2.202	20.322
NFE2L2	MA0150.1	Zipper-Type	Leucine Zipper	vertebrates	14.394	0.486	467	1148	5635	19117	778	0.0028	8970	0.00274	1.988	17.876
CTCF	MA0139.1	Zinc-coordinating	BetaBetaAlpha-zinc finger	vertebrates	17.205	0.645	294	1321	3236	21516	346	0.00215	3982	0.0021	1.888	18.346
Esrrb	MA0141.1	Zinc-coordinating	Hormone-nuclear Receptor	vertebrates	12.806	0.524	813	802	10167	14585	2261	0.00888	26346	0.00878	1.805	29.152
RORA_1	MA0071.1	Zinc-coordinating	Hormone-nuclear Receptor	vertebrates	13.19	0.424	694	921	8624	16128	1626	0.00532	18895	0.00525	1.743	24.027
Sox17	MA0078.1	Other Alpha-Helix	High Mobility Group	vertebrates	10.502	0.384	1086	529	13879	10873	5635	0.0166	65883	0.0165	1.713	42.426
HNF4A	MA0114.1	Zinc-coordinating	Hormone-nuclear Receptor	vertebrates	9.617	0.522	545	1070	6389	18363	967	0.00412	11240	0.00406	1.501	26.122
NFATC2	MA0152.1	Ig-fold	Rel	vertebrates	9.859	0.346	1169	446	15176	9576	8336	0.0191	97757	0.019	1.104	44.001
Evi1	MA0029.1	Zinc-coordinating	BetaBetaAlpha-zinc finger	vertebrates	17.909	0.28	157	1458	1931	22821	212	0.000972	2457	0.000956	0.881	5.524
Myb	MA0100.1	Helix-Turn-Helix	Myb	vertebrates	9.883	0.591	1059	556	13518	11234	4987	0.0131	58600	0.013	0.508	40.458
CREB1	MA0018.2	Zipper-Type	Leucine Zipper	vertebrates	10.139	0.523	751	864	9204	15548	1679	0.0044	19712	0.00438	0.392	30.122
Spz1	MA0111.1	Other	Other	vertebrates	11.907	0.538	566	1049	6658	18094	1067	0.00384	12530	0.00383	0.339	26.839
YY1	MA0095.1	Zinc-coordinating	BetaBetaAlpha-zinc finger	vertebrates	8.101	0.51	1301	314	17190	7562	14024	0.0275	165054	0.0275	0.273	51.117
Stat3	MA0144.1	Ig-fold	Stat	vertebrates	13.601	0.505	817	798	9883	14869	1996	0.00653	23645	0.00657	-0.793	37.951
INSM1	MA0155.1	Zinc-coordinating	BetaBetaAlpha-zinc finger	vertebrates	14.862	0.667	621	994	7588	17164	1492	0.00586	17685	0.0059	-0.831	23.396
NHLH1	MA0048.1	Zipper-Type	Helix-Loop-Helix	vertebrates	14.132	0.674	484	1131	5783	18969	830	0.00326	9874	0.00329	-0.984	19.937
ELF5	MA0136.1	Winged Helix-Turn-Helix	Ets	vertebrates	8.693	0.429	1243	372	16547	8205	9930	0.0293	117435	0.0294	-1.181	40.226
Myf	MA0055.1	Zipper-Type	Helix-Loop-Helix	vertebrates	15.914	0.609	828	787	10157	14595	2317	0.0091	27519	0.00918	-1.371	35.015
NF-kappaB	MA0061.1	Ig-fold	Rel	vertebrates	13.345	0.621	694	921	8381	16371	1584	0.00519	18865	0.00524	-1.382	29.792
NR3C1	MA0113.1	Zinc-coordinating	Hormone-nuclear Receptor	vertebrates	14.749	0.432	206	1409	2522	22230	263	0.00155	3161	0.00158	-1.388	7.127
Hand1::Tcfe2a	MA0092.1	Zipper-Type	Helix-Loop-Helix	vertebrates	10.144	0.507	1053	562	13286	11466	4616	0.0151	54768	0.0152	-1.548	44.284
GABPA	MA0062.2	Winged Helix-Turn-Helix	Ets	vertebrates	13.335	0.647	774	841	9355	15397	1754	0.00632	20927	0.0064	-1.774	34.969
Pax5	MA0014.1	Helix-Turn-Helix	Homeo	vertebrates	12.432	0.575	97	1518	1224	23528	111	0.000727	1364	0.000758	-2	3.33
SPIB	MA0081.1	Winged Helix-Turn-Helix	Ets	vertebrates	9.06	0.466	1305	310	17547	7205	14812	0.0339	175639	0.0342	-2.149	42.168
RXR::RAR_DR5	MA0159.1	Zinc-coordinating	Hormone-nuclear Receptor	vertebrates	16.004	0.535	111	1504	1313	23439	121	0.000673	1499	0.000708	-2.294	5.269
TEAD1	MA0090.1	Helix-Turn-Helix	Homeo	vertebrates	15.678	0.507	419	1196	5222	19530	698	0.00274	8446	0.00282	-2.461	12.482
Arnt	MA0004.1	Zipper-Type	Helix-Loop-Helix	vertebrates	10.992	0.642	588	1027	7052	17700	1144	0.00225	13904	0.00232	-2.595	24.832
Ddit3::Cebpa	MA0019.1	Zipper-Type	Leucine Zipper	vertebrates	11.652	0.483	446	1169	5576	19176	804	0.00316	9754	0.00325	-2.897	13.054
USF1	MA0093.1	Zipper-Type	Helix-Loop-Helix	vertebrates	11.29	0.643	761	854	9330	15422	1818	0.00417	21993	0.00428	-3.006	30.663
TAL1::TCF3	MA0091.1	Zipper-Type	Helix-Loop-Helix	vertebrates	14.07	0.453	572	1043	7491	17261	1215	0.00477	14681	0.0049	-3.075	11.565
Zfp423	MA0116.1	Zinc-coordinating	BetaBetaAlpha-zinc finger	vertebrates	17.925	0.679	450	1165	5691	19061	838	0.00411	10149	0.00423	-3.114	12.017
Tcfcp2l1	MA0145.1	Other	CP2	vertebrates	11.65	0.609	852	763	10591	14161	2688	0.0123	32190	0.0125	-3.208	33.14
EWSR1-FLI1	MA0149.1	Winged Helix-Turn-Helix	Ets	vertebrates	32.871	0.554	14	1601	207	24545	14	8.25e-05	209	0.000105	-3.797	0.718
TP53	MA0106.1	Zinc-coordinating	Loop-Sheet-Helix	vertebrates	26.239	0.603	0	1615	8	24744	0	0	8	4.45e-06	-3.821	0
RELA	MA0107.1	Ig-fold	Rel	vertebrates	14.757	0.567	584	1031	7171	17581	1121	0.00367	13690	0.0038	-3.824	20.784
ELK1	MA0028.1	Winged Helix-Turn-Helix	Ets	vertebrates	8.812	0.568	1096	519	13642	11110	4555	0.0149	54748	0.0152	-4.32	54.354
NFKB1	MA0105.1	Ig-fold	Rel	vertebrates	15.627	0.758	321	1294	3946	20806	510	0.00184	6372	0.00195	-4.417	10.463
ESR2	MA0258.1	Zinc-coordinating	Hormone-nuclear Receptor	vertebrates	13.618	0.546	171	1444	2219	22533	210	0.00124	2670	0.00134	-4.702	4.076
HIF1A::ARNT	MA0259.1	Zipper-Type	Helix-Loop-Helix	vertebrates	9.74	0.657	906	709	10914	13838	3100	0.00812	37662	0.00837	-4.876	46.813
STAT1	MA0137.2	Ig-fold	Stat	vertebrates	13.119	0.452	530	1085	6394	18358	892	0.00438	10990	0.00458	-5.203	20.863
RUNX1	MA0002.2	Ig-fold	Runt	vertebrates	10.401	0.502	1033	582	13641	11111	4868	0.0175	58648	0.0179	-5.24	27.158
FEV	MA0156.1	Winged Helix-Turn-Helix	Ets	vertebrates	12.121	0.442	1171	444	15402	9350	6783	0.0178	81722	0.0182	-5.284	38.588
Arnt::Ahr	MA0006.1	Zipper-Type	Helix-Loop-Helix	vertebrates	9.532	0.715	1069	546	13597	11155	5448	0.0107	66086	0.011	-5.324	42.695
Mycn	MA0104.2	Zipper-Type	Helix-Loop-Helix	vertebrates	11.104	0.699	691	924	8332	16420	1539	0.00504	18928	0.00526	-5.362	29.926
RREB1	MA0073.1	Zinc-coordinating	BetaBetaAlpha-zinc finger	vertebrates	22.278	0.623	122	1493	1520	23232	141	0.000923	1839	0.00102	-5.419	4.213
SPI1	MA0080.2	Winged Helix-Turn-Helix	Ets	vertebrates	9.64	0.435	1209	406	15792	8960	7940	0.0182	95792	0.0186	-5.673	45.48
Egr1	MA0162.1	Zinc-coordinating	BetaBetaAlpha-zinc finger	vertebrates	14.456	0.739	536	1079	6364	18388	976	0.00351	12188	0.00373	-6.058	23.569
RXRA::VDR	MA0074.1	Zinc-coordinating	Hormone-nuclear Receptor	vertebrates	20.451	0.527	29	1586	453	24299	30	0.000147	475	0.000198	-6.316	0.567
REL	MA0101.1	Ig-fold	Rel	vertebrates	10.515	0.559	843	772	10514	14238	2381	0.00779	29250	0.00813	-6.499	31.674
PPARG::RXRA	MA0065.2	Zinc-coordinating	Hormone-nuclear Receptor	vertebrates	11.663	0.547	484	1131	6067	18685	889	0.00437	11080	0.00462	-6.529	14.038
Myc	MA0147.1	Zipper-Type	Helix-Loop-Helix	vertebrates	11.157	0.686	675	940	8288	16464	1473	0.00482	18476	0.00513	-7.639	25.34
E2F1	MA0024.1	Winged Helix-Turn-Helix	E2F	vertebrates	13.838	0.625	650	965	8113	16639	1383	0.00362	17630	0.00392	-8.323	21.126
ZNF354C	MA0130.1	Zinc-coordinating	BetaBetaAlpha-zinc finger	vertebrates	8.958	0.615	1301	314	17566	7186	17108	0.0336	207738	0.0346	-9.88	39.559
PLAG1	MA0163.1	Zinc-coordinating	BetaBetaAlpha-zinc finger	vertebrates	19.352	0.798	143	1472	1971	22781	170	0.000779	2462	0.000958	-10.106	2.205
Zfx	MA0146.1	Zinc-coordinating	BetaBetaAlpha-zinc finger	vertebrates	13.077	0.749	798	817	9872	14880	2672	0.0122	33238	0.0129	-10.6	30.858
EBF1	MA0154.1	Zipper-Type	Helix-Loop-Helix	vertebrates	11.564	0.648	857	758	11288	13464	3118	0.0102	39149	0.0109	-11.322	19.474
REST	MA0138.2	Zinc-coordinating	BetaBetaAlpha-zinc finger	vertebrates	23.134	0.596	9	1606	232	24520	9	6.19e-05	242	0.000141	-11.695	0.038
MZF1_5-13	MA0057.1	Zinc-coordinating	BetaBetaAlpha-zinc finger	vertebrates	9.4	0.588	1053	562	13425	11327	6281	0.0206	77649	0.0216	-12.223	40.39
Klf4	MA0039.2	Zinc-coordinating	BetaBetaAlpha-zinc finger	vertebrates	12.618	0.771	1070	545	13645	11107	7113	0.0233	88731	0.0247	-15.464	41.799
SP1	MA0079.2	Zinc-coordinating	BetaBetaAlpha-zinc finger	vertebrates	11.129	0.82	998	617	12391	12361	6289	0.0206	79797	0.0222	-18.835	45.084
MZF1_1-4	MA0056.1	Zinc-coordinating	BetaBetaAlpha-zinc finger	vertebrates	8.586	0.725	1286	329	16863	7889	16036	0.0315	201000	0.0335	-19.577	53.207
